# Supplementary material for: Burnout Among Mid-Career Academic Medical Faculty
Source: PubMed Central journal article supplement (PMC11165383; doi:10.1001/jamanetworkopen.2024.15593), 2024-06-10
Supplement: jamanetwopen-e2415593-s002.pdf [file jamanetwopen-e2415593-s002.pdf]

## Data Sharing Statement

Paradis. Burnout Among Mid-Career Academic Medical Faculty. *JAMA Netw Open*. Published June 10, 2024. doi:10.1001/jamanetworkopen.2024.15593

### Data

**Data available:** No

### Additional Information

**Explanation for why data not available:** Data in this study will not be shared to protect participant confidentiality.
